# Supplementary material
Source: PubMed Central journal article supplement (PMC3426640)
Supplement: NIHMS383765-supplement-1_si_001.pdf [file NIHMS383765-supplement-1_si_001.pdf]

**Supporting Information.**

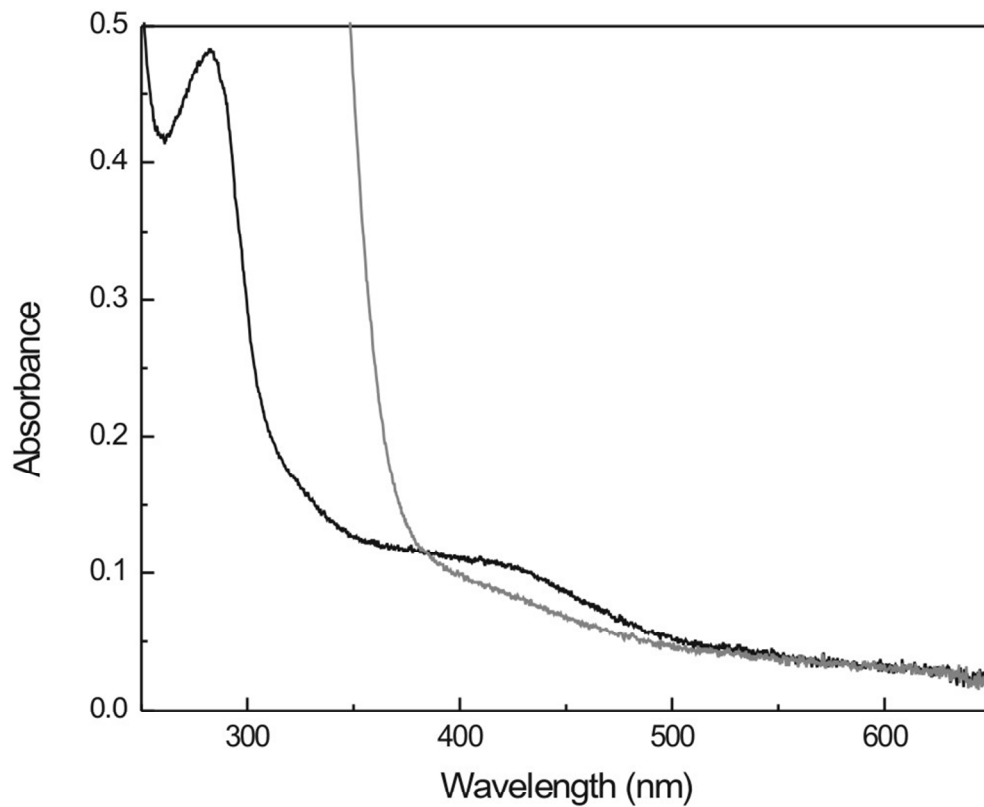

**Figure S1. UV-visible absorption of as-isolated (—) and dithionite-reduced (—) IspH protein from *E. coli*. The peak at 330 nm is due to dithionite.**

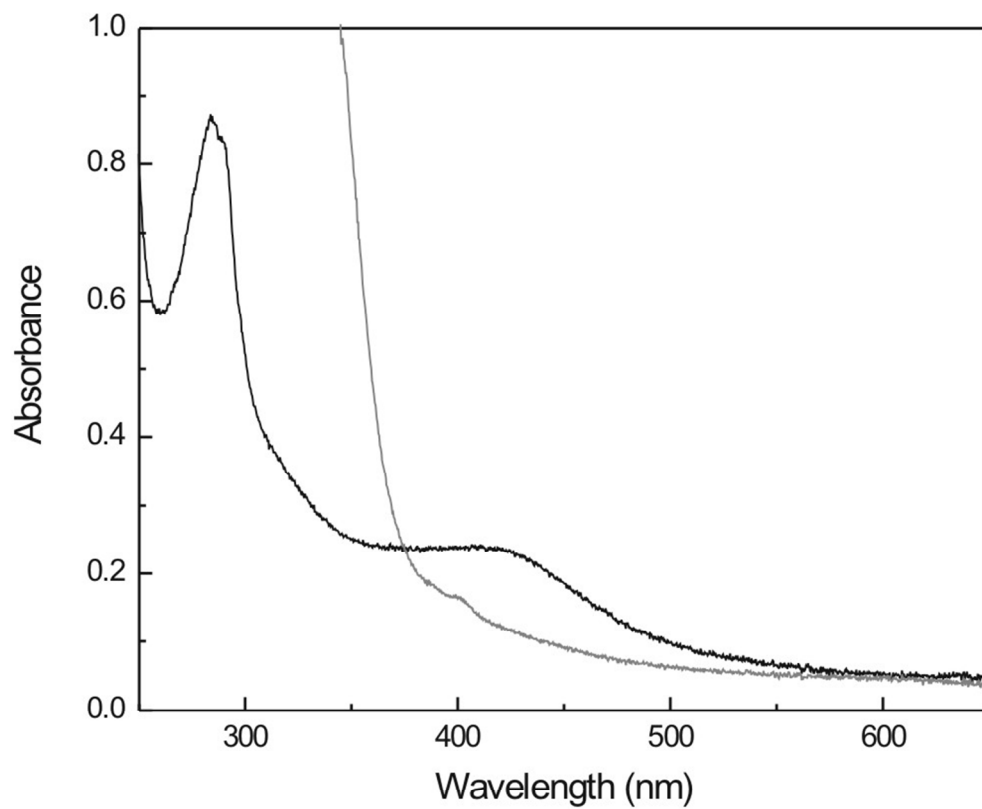

**Figure S2.** UV-visible absorption of as-isolated (—) and dithionite-reduced (---) IspH protein from *P. falciparum*. The peak at 330 nm is due to dithionite.

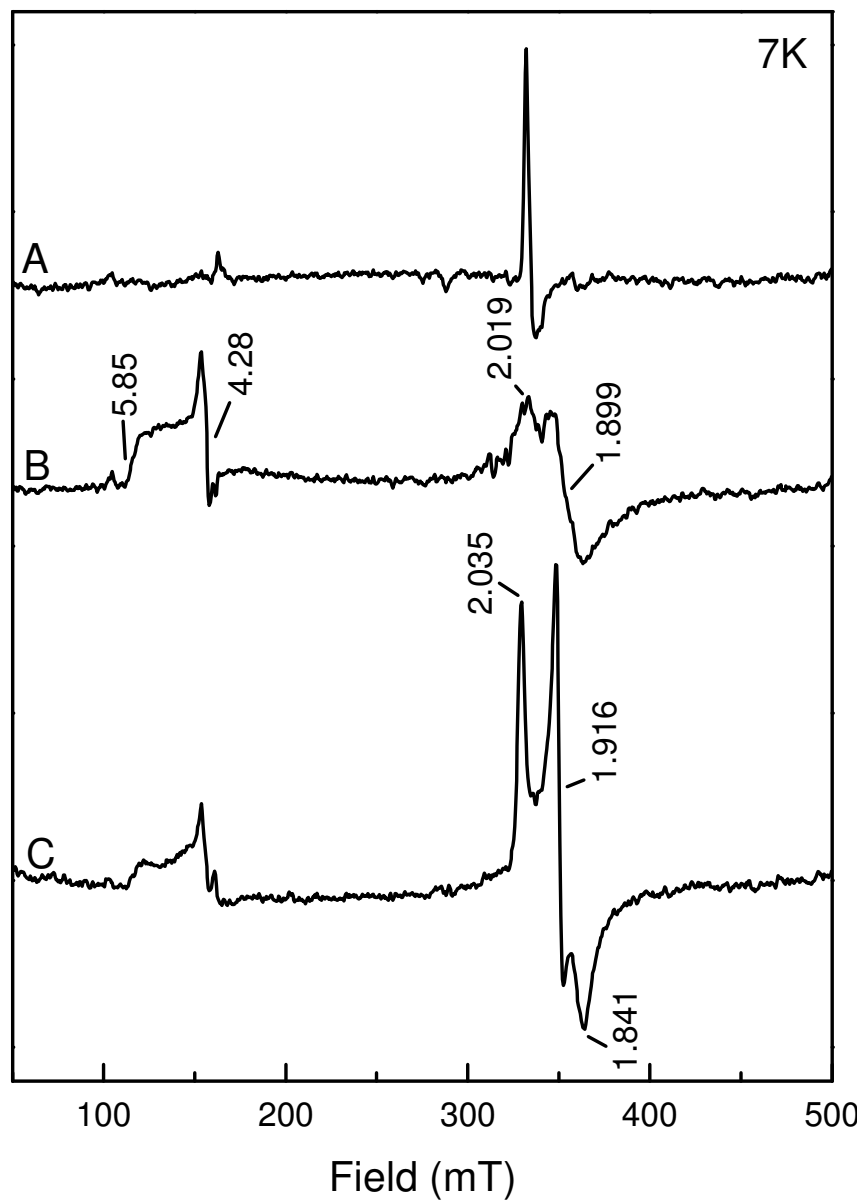

**Figure S3. EPR spectra of IspH protein from *A. aeolicus*.** (A) As-isolated; (B) Reduced with an excess dithionite; (C) Reduced with an excess dithionite in the presence of 20% ethylene glycol. IspH concentration in the samples, 0.36 mM; dithionite, 2 mM. EPR conditions: Microwave power (A) 2 mW, (B) 2 mW, and (C) 0.02 mW.

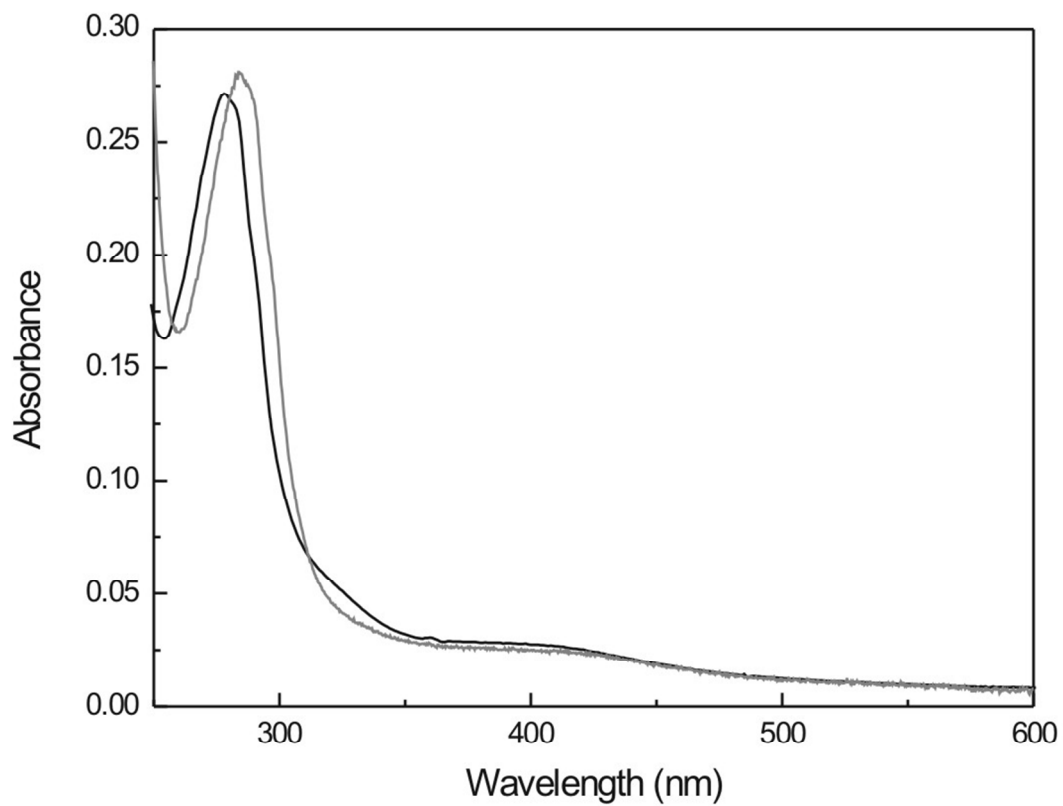

**Figure S4. Absorption spectra of IspH protein from *P. falciparum* before the treatment with Chelex Resin (—) and after the treatment with Chelex Resin (---). Spectra were corrected for differences in concentration.**

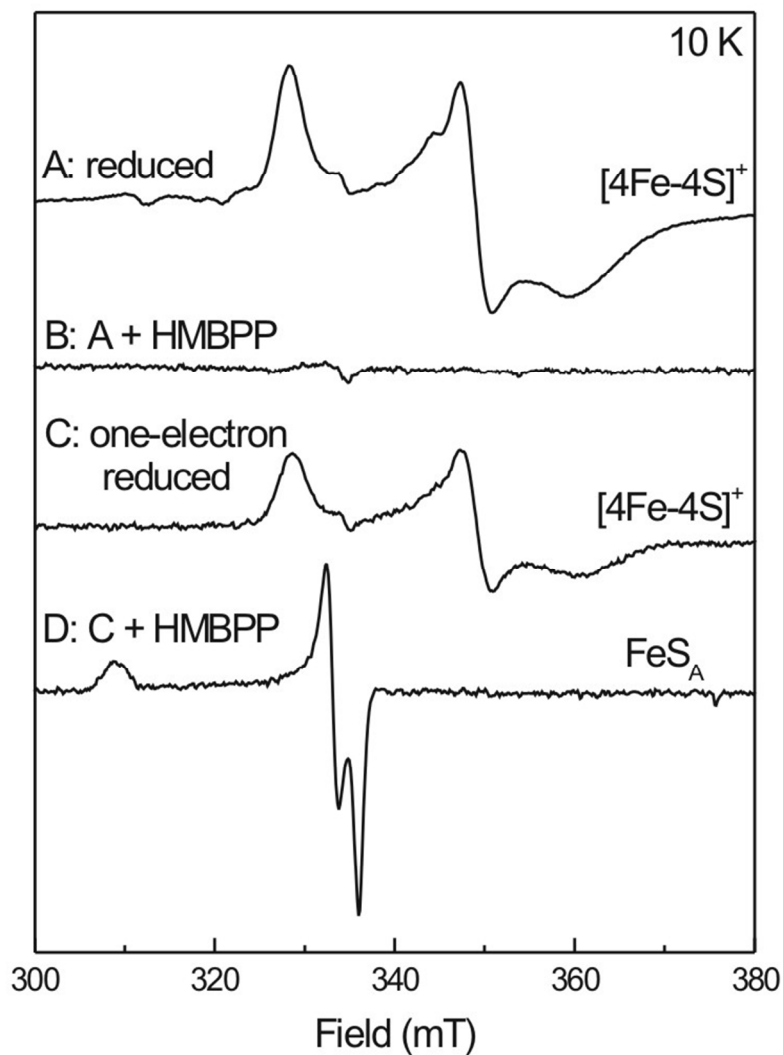

**Figure S5. Effect of HMBPP on the  $[4\text{Fe-4S}]^+$  signal of *A. aeolicus* IspH.** (A) Reduced IspH with a 10x excess of dithionite. (B) Sample A after addition of HMBPP and incubation of 8 sec at RT before freezing in cold ethanol (200 K). (C) One-electron reduced IspH. (D) Sample C after addition of HMBPP and incubation for 8 sec before freezing. EPR conditions: Microwave power (A) 0.2 mW, (B) 0.2 mW, (C) 0.2 mW, and (D) 2  $\mu\text{W}$ .

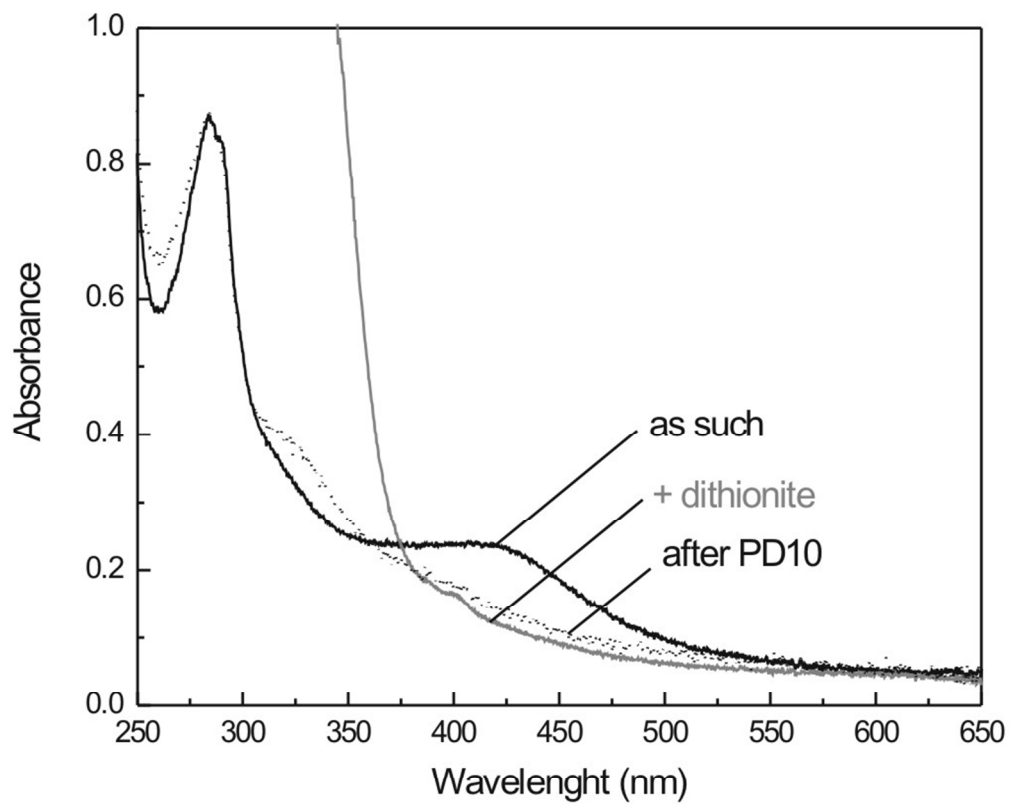

**Figure S6.** UV-visible absorption of as-isolated (—), dithionite-reduced (---), and desalted (····) IspH protein from *P. falciparum*. The peak at 330 nm is due to dithionite.

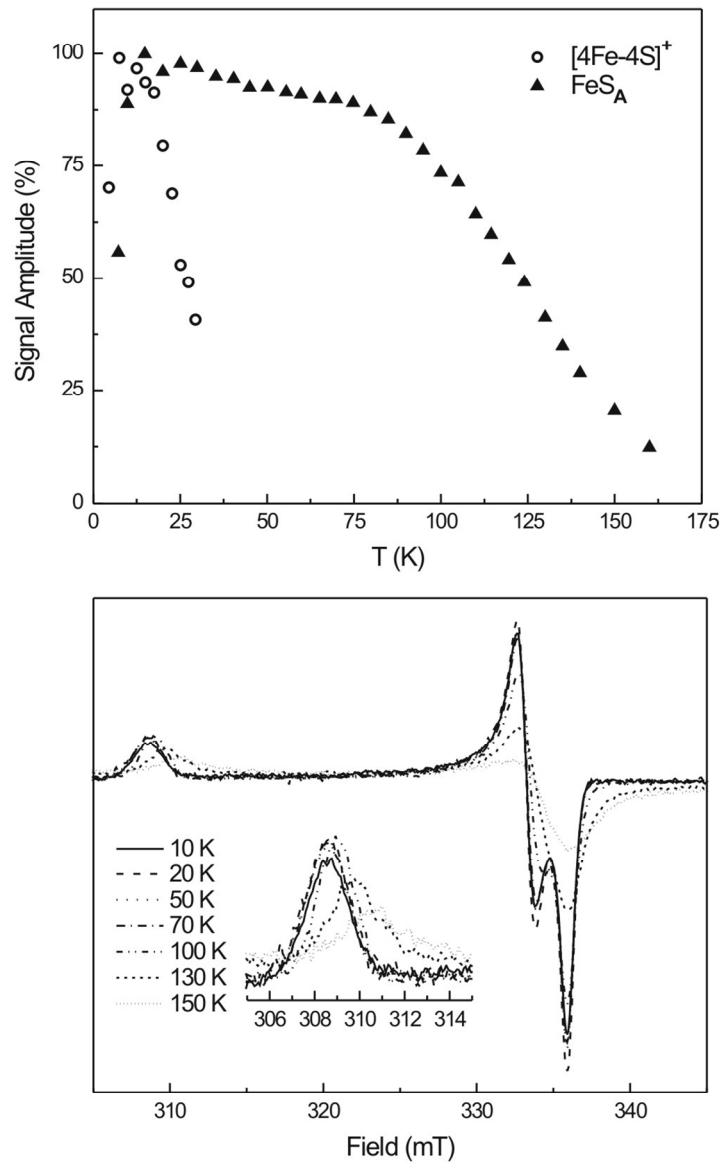

**Figure S7. Curie plots for the EPR signals in IspH from *A. aeolicus*. (A)**

Normalized signal intensity ( $I_n$ ) as a function of the temperature for the [4Fe-4S]<sup>+</sup> signal (○) and the FeS<sub>A</sub> species (□). (B) Overlay of the normalized spectra of the FeS<sub>A</sub> species.

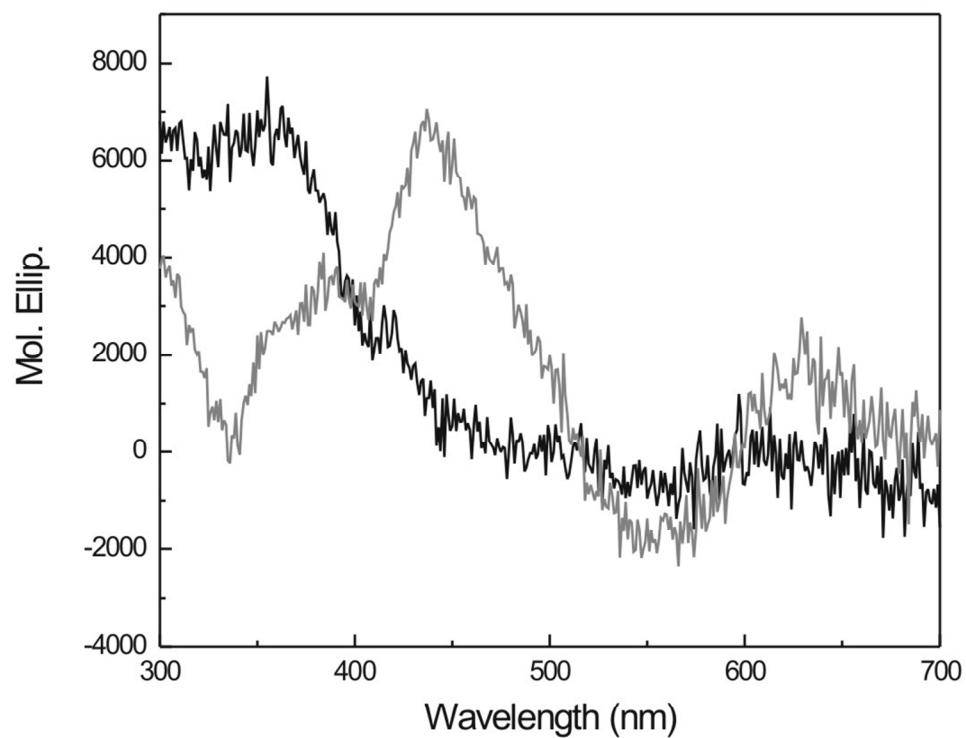

**Figure S8. Circular dichroism spectra of reconstituted IspH from *A. aeolicus*.**

(—) As-isolated enzyme. (---) Enzyme in the presence of HMBPP. IspH

concentration was 0.6 mM. HMBPP concentration was 4.76 mM.



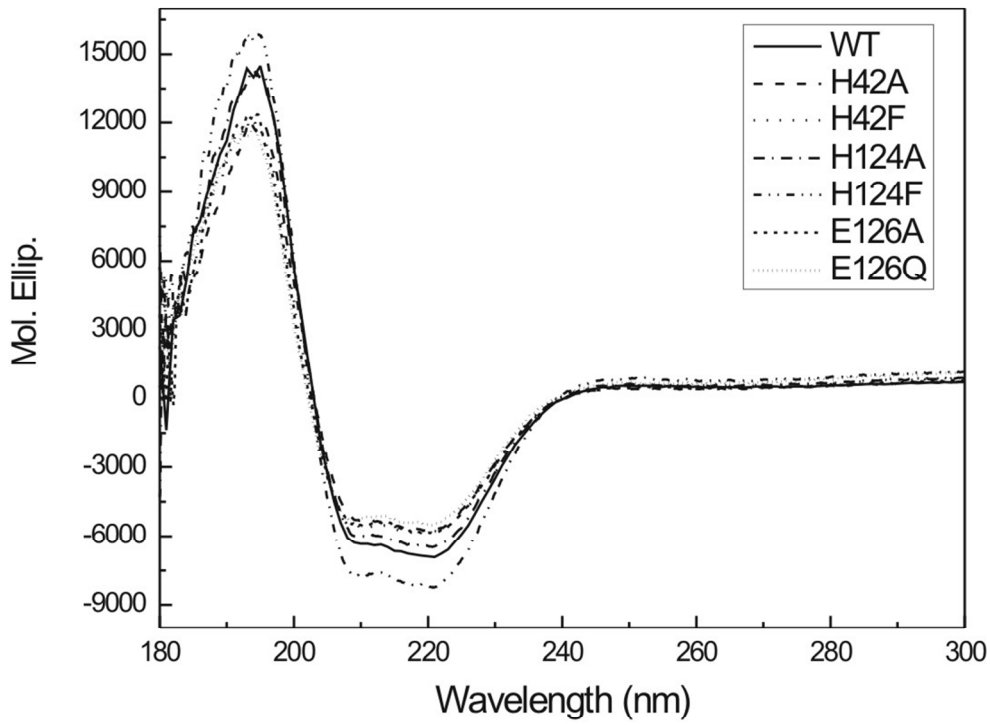

**Figure S9. Circular dichroism spectra of WT and mutant IspH proteins from *A. aeolicus*.**

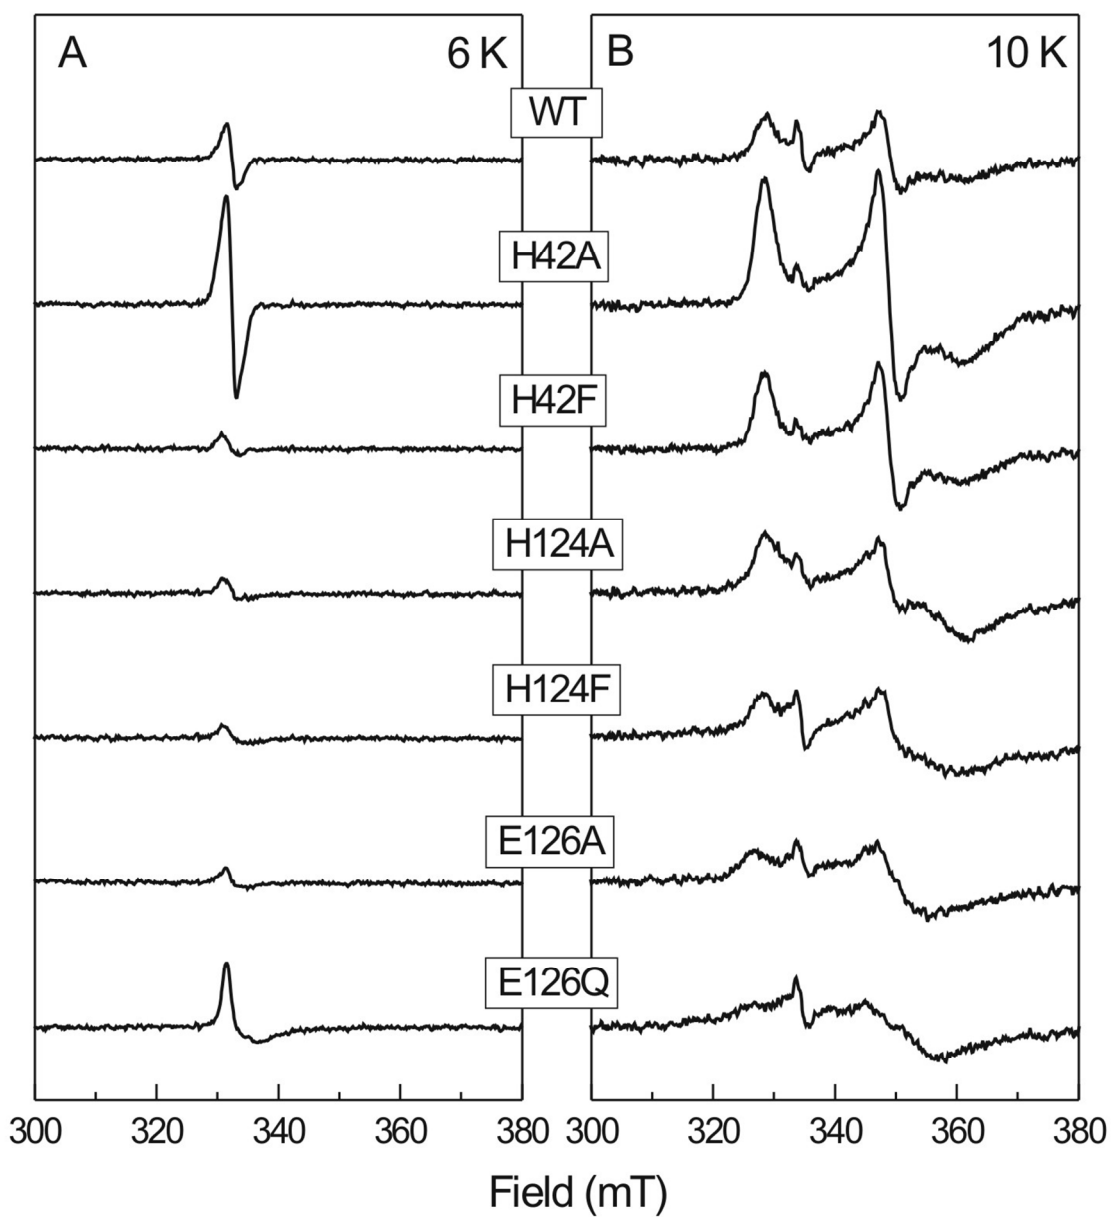

**Figure S10. EPR spectra of WT and mutant IspH proteins from *A. aeolicus*.** (A)

Enzyme as isolated. (B) Enzyme in the presence of dithionite. EPR conditions:

Microwave power: Panel A, 2 mW; Panel B, 0.2 mW.
